# Supplementary material for: Experimental evidence of the rear capture of aerosol particles by raindrops
Source: Copernicus journal article supplement (doi:10.5194/acp-2016-1085), 2017-01-05
Supplement: Supplementary file [file acp-2016-1085-AC2-supplement.pdf]

Dear reviewer,

Please find the point by point answer to your questions

To facilitate the discussion I adopted a colour code:

- In black are your questions
- In Blue are the answers
- In Green are the modifications or additions in the article

Thank you for taking your time for the review

Kind regards

**Q1** : p.1. line 31: "Aerosol particles are important components. . ." – please correct.

This is modified

**Q2** : p. 1. Line 33: "our" should be read instead of "out"

This is modified

p. 2. Line 34: You compare the results of your measurements against the model  
**Q3** : outcomes, but not the measurement itself. Please revise.

This is modified

**Q4** : p. 6., Fig. 2: Pressurized should be written instead of Pressurisez

This is modified

**Q5** : p. 7. Line 6: What does S<sub>goutte</sub> stand for?

This is modified

p. 7. Eq. 4: Is this formula equivalent with the integration method of Müller et al. ? If no, how is it related to that? What is the accuracy of the size determination using Eq.  
**Q6** :<sup>4?</sup>

I don't know what is the integration method of Müller et al.. However we added details on the experimental setup, its resolution, and the hypothesis behind this equation (axisymmetric drops).

We write (P 8 line 8 to 27)

“For each opening time, shadowgraph measurements were taken in the aerosol chamber of the BERGAME facility. An optical window is used to trigger the photographing of each drop entering the BERGAME aerosol

chamber. Our optical device is a camera (Andor: neo, sCMOS) with a resolution of  $2560 \times 2160$  pixels<sup>2</sup>. It is equipped with a Canon macro lens (MP-E 65mm f/2.8 1-5x) for a magnification of 3:1 (experimentally checked with a calibration chart). The pixel size is  $6.5 \mu\text{m}$ , for a spatial resolution of  $2.1 \mu\text{m}$ . Drops are backlitged with a  $9 \text{ ns}$  strobe to freeze their fall on the sensor. An example of a shadowgraph image is shown in Figure 3.

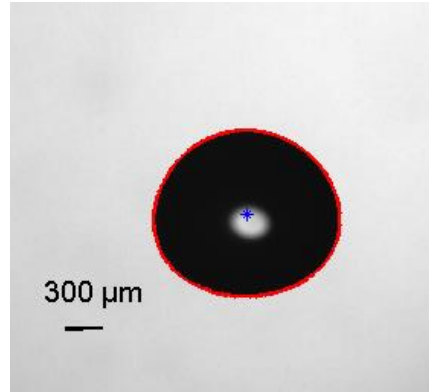

Figure 1. Example of a shadow image

Due to the oscillations, the millimetric drops exhibit an oblate spheroid shape. To define the size of the raindrops the notion of “diameter equivalent to a sphere of the same volume” has been adopted. Since shadowgraphy yields only a 2-D information, the diameters are equivalent to a disc. For axisymmetric objects, volume and surface equivalent diameter are equal. Szakáll *et al.* (2009) experimentally verified this axisymmetric of drop of that size range at terminal velocity. Thus, shadow images are used and processed to deduce the projected surface area of the drop ( $S_{drop}$ ) and derive the diameter of the disc of equal surface area ( $D_{eq}$ ).

$$D_{eq} = \sqrt{\frac{4 S_{drop}}{\pi}} \quad (4) \quad \ll$$

p. 7. Figure 4: The caption is actually wrong. The figure does not show the setting parameters, such as pressure, opening time, but the generated drop diameters using a predefined pressure and different opening times. Please revise the caption.

We changed the caption to :

“Figure 2. Measured equivalent diameter of the drop produced by our generator as a function of the valve opening time (for an over pressure of 0.3 bar) “

Q8 : p. 8. Line 2: The sentence should be reformulated.

Reformulated :

“In order to be representative of rain the drops must cross the BERGAME aerosol chamber at their terminal velocity”

p. 8. Line 15: I believe the fall distance to reach terminal velocity was sufficient in the experiments, which could/should also been shown here by comparing the result with the theoretical calculations of Wang and Pruppacher (1977).

**Q9 :**

We added the comparison in the article (p10 line 1 to 10).

“We note in this figure that up to a drop diameter of 1.4 mm, the 8 m distance is sufficient to accelerate the drops to their terminal velocity. This is consistent with the results of the theoretical calculations of Wang and Pruppacher (1977b), which predict that 6.5 m free fall is enough for a 1.4 mm drop to reach 99% of terminal velocity.”

Indeed the Wang model was used to dimension our free fall shaft.

p. 8. Line 17: How did you determine the axis ratio? Is it just the ratio of the vertical and horizontal dimensions of the drop? Do you see any canting of the drops, or are they perfectly horizontally aligned?

**Q10 :**

No canting was observed in the drop size range investigated in the article. The axis ratio is calculated as the ratio between the vertical and horizontal dimensions of the drop. We wrote (p 10 line 8 to 10):

“For the drop sizes investigated, drop can be considered as horizontally aligned oblate spheroids (Figure 3), no tilt angle was measured, which is consistent with Pruppacher & Beard (1970) measurements. This is why, the axis ratio is computed as the ratio between the vertical and horizontal dimensions of the drop. “

p. 9: Line 18: APS; ELPI: online methods; filter: offline method. Can you compare their results?

**Q11 :**

This comparison performed on each experiment and is quite good: less than 10 % difference. We decided to keep the filter measurement as a reference to calculate the collection efficiency because in minimise the uncertainties. Indeed, the use of APS an ELPI measurement would induce additional hypothesis on the purity of the fluorescein salt (the supplier guarantees a purity of almost 97%) and the perfect sphericity.of the aerosol particles.

“For each of the particle sizes produced, the fluorescein mass concentrations in the aerosol chamber derived from APS and ELPI measurements are compared with ones derived from filter measurements (section 2.2). These comparisons provide slight differences (~10%) that can be attributed to both the purity of fluorescein sodium salt used (~97%) and the shape of the aerosol particles that is not perfectly spherical. Thus, for

improving the accuracy of collection efficiency measurements, the fluorescein concentration inside the aerosol chamber is derived from filter measurements, and APS and ELPI are used to provide a precise measurement of the particle size.”

**Q12 :** p. 10. Figure 7: I think some labels and arrows are shifted in the Figure.

This point has been corrected

**Q13 :** p. 10. Line 9: How does argon help to minimize sedimentation? I think it would be useful to explain it in somewhat more detail.

The first experiments were performed without this argon layer. They showed a fast settling of the particles in the drop collector. This settling was order of magnitudes faster than the settling velocity of individual aerosol particles. A literature review on this point indicated that this fast “cloud settling” could be induced by Rayleigh-Taylor instabilities (Hinds *et al.*, 2002). These instabilities arise when a dense layer overlies a lighter one. As Argon is very dense this phenomena is not observed if the aerosol cloud overlies argon.

Using the layer of argon in the buffer volume allowed keeping the drop collector clean of particles for a period compatible with the experiments.

We wrote (p12 line 9 to 11) :

“One of the principal difficulties of these experiments relates to the sedimentation of the cloud of particles that settles directly inside the drop collector. Indeed, Rayleigh-Taylor instabilities can arise when a dense cloud of aerosol particles overlies a layer of clean air. These instabilities induce a downward motion of the aerosol cloud much faster than the settling velocity of individual particles (Hinds et al., 2002). In order to avoid this effect, a layer of argon (which is denser than the cloud of particles) is formed in the bottom of the aerosol chamber, located below the second gate valve in **Erreur ! Source du renvoi introuvable.**”

**Q14 :** p. 11. Line 15: The sentence should be revised.

This typo is corrected:

“Changing the concentration of the solute dissolved in the water varies the size of the produced particles

**Q15 :** p. 11. Line 24: What are the detection limits of the methods? I suggest to indicate these detection limits also in the figure?

We introduced the measurement method of both APS and ELPI spectrometers at the beginning of section 2.3 (p13, line 4 to 19). Moreover we added on figure 7 the measurement range and the resolution of both instruments on figure 7.

“The aerosol particles size distributions are measured using an Electrical Low Pressure Impactor (ELPI,  $\delta$ ) and an Aerodynamic Particle Sizer (APS,  $\chi$ ).

ELPI is a quasi-real-time aerosol spectrometer (Marjamäki et al., 2000). It is composed of a corona charger and a 12-stage cascade low pressure impactor. Each stage of the impactor is connected to an electrometer. The corona charger is used to set the electrical charge of the particles to a specific level. Then, the low pressure impactor classifies the aerosol particles into 12 size classes according to their aerodynamic diameter (from 7 nm to 10  $\mu\text{m}$ ). Finally, the electrometers measure the electrical charge carried by the particles collected by each impaction stage. This charge is finally converted to the number of particles collected according to the charging efficiency function of the corona charger.

APS is also a quasi-real-time aerosol spectrometer (Baron, 1986). It measures the time-of-flight of individual particles accelerated by a controlled accelerating flow imposed by a calibrated nozzle. The time-of-flight of each aerosol particle is then converted into its aerodynamic diameter. Thus, the APS classifies the aerosol particles in terms of aerodynamic diameter from 500 nm to 20  $\mu\text{m}$  over 52 size classes.

APS and ELPI are both used for their complementary size ranges so all the particles produced in our laboratory can be sized. For particles with a median aerodynamic diameter less than 0.8  $\mu\text{m}$ , the size distribution is measured using an ELPI. For the others, we favour the use of an APS because of the better size resolution. “

p. 12. Line 29: Within the 10 minutes measurement time the collected drops might evaporate. How do you deal with this water loss in the collector?  
**Q16 :**

This point is discussed in appendix 1. We added this potential water evaporation to the global uncertainty on the fluorescein concentration in the drop.

We then derive the relative measurement uncertainty of the fluorescein concentration in the drops ( $u_{R,[fluor]_{drop}}$ ). This relative uncertainty has two contributions. The first one is due to the spectrometer relative measurement uncertainty on the fluorescein concentration ( $u_{R,[fluor]}$ ), and the second one is due to a potential variation of the volume of water collected, (in the drop collector, Figure 7), due to vaporization during the experiments ( $u_{R,V_{collected}}$ ).

$$u_{R,[fluor]_{drop}} = \sqrt{(u_{R,[fluor]})^2 + (u_{R,V_{collected}})^2}$$
$$u_{R,[fluor]} = \frac{U_{R,[fluor]}}{2} = \frac{0.05}{2}$$

The uncertainty on the volume of water collected ( $u_{R,V_{collected}}$ ) is estimated with the maximum variation of the volume of liquid water in the drop collector, due to vaporisation ( $EMT_{V_{collected}}$ ).

$$u_{R,V_{collected}} = \frac{EMT_{V_{collected}}}{3 V_{collected}}$$

In this equation, the volume of water collected ( $V_{collected}$ ) is greater than one cubic centimetre (section 2.4). The maximum variation of the volume of liquid water in the drop collector ( $EMT_{V_{collected}}$ ) is evaluated supposing

that during the experiment period (section 2.4) the entire volume of the buffer ( $V_{buffer}$ ) becomes saturated with water vapour. This leads to:

$$EMT_{V_{collected}} = \frac{3 M_{H_2O} P_{sat}(T_{air}) V_{buffer}}{RT_{air} \rho_{liquid-water}} = 1.2 \times 10^{-2} cm^3.$$

In this equation, R is the perfect gas constant,  $P_{sat}$  is the saturation vapour pressure,  $\rho_{liquid-water}$  is the density of liquid water,  $M_{H_2O}$  is the molar mass of water and  $T_{air}$  the gas temperature in the buffer. The three coefficient on the numerator comes from the fact that the buffer volume is flushed three times during the measurement period (section 2.4).

$$u_{R,[fluo]_{drop}} = \sqrt{\left(\frac{0.05}{2}\right)^2 + \left(\frac{1.2 \times 10^{-2}}{3 \times 1}\right)^2} \approx 0.025$$

p. 13. Figure 9: Where is the buffer volume? I suppose it is between the drop collector and the knife gate valve, right? It should be shown in the figure in this way.  
**Q17 :**

Figure 9 is modified to show what we call the buffer volume. Moreover we added a small text just before the figure:

“At the end of these 200 seconds phases, the gate valves are closed again and the buffer volume between gate valve  $\phi$  and the drop collector is flushed with argon (**Erreur ! Source du renvoi introuvable.**)”

p. 13. Line 20: You claim that you measured the stability of the aerosol generator.  
**Q18 :** What was the result of it? It is not indicated.

This was an imprecise formulation we verified the reproducibility. It was checked by reproducing several times the same procedure for the aerosol injection and comparing the characteristics of the aerosol particles (size, number and especially the concentration), at the end of the relaxation phase. Once we verified that same injection procedures give rise to reproducible initial conditions (with differences smaller than the uncertainty on the fluorescence spectrometer), we measurements the mass concentration of the aerosol particles but 15 min after the end of the relaxation phase. This showed a decrease oh 8% of the concentration during the all experiment. This 8 % decrease is the main source of uncertainty of our measurements (Appendix 1).

“For this, we have first verified the reproducibility of characteristics of the aerosol produced by the aerosol generator, in size, number and concentration. This is performed by repeating the injection phase with exactly the same operating conditions. No variation of the fluorescein concentration greater than the uncertainty of the fluorimeter ( $\pm 2.5\%$  , appendix 1) has ever been measured”

p. 13. Eq 6. What do here  $M_{gtte}$ , and  $[fluo]_{drop}$  stay for?  
**Q19 :**

This is corrected:

“The mass of fluorescein in the drops during the experiments ( $M_{drop}$ ) is easy to calculate:

$$M_{drop} = \frac{\pi D_{drop}^3}{6} [fluor]_{drop} \quad (6)$$

where  $[fluor]_{chamber}$  is the mass concentration of fluorescein in the aerosol chamber and  $H$  the height of the aerosol chamber (1.3 m, Figure 1)."

**Q20:** p. 14. Eq. 7: What is H in the equation?

The definition of H I added in the text below equation 7 and also on figure 1.

"... and  $H$  the height of the aerosol chamber (1.3 m, Figure 1)."

**Q21 :** p. 14. Line 3: Eq. 8 is just the ratio between Eq. 6 and 7; this should be noted again.

This remark is taken into account:

$$E(d_{aero}, D_{drop}, RH) = \frac{M_{drop}}{M_2} = \frac{2 D_{drop} \cdot [fluor]_{drop}}{3H \cdot [fluor]_{chamber}} \quad (8)"$$

**Q22 :** p. 14. Line 8-9: The word "same" is unnecessarily often used.

Corrected

p. 14. Line 13: I believe you mean here the resolution of the instruments. It would therefore be worthwhile to give some specifications of them; such as detection limit (see one of my earlier comments), resolution, etc.

**Q23 :**

This remark is taken into account together with question 15. We added a paragraph at the beginning of section 2.3.

"The aerosol particles size distributions are measured using an Electrical Low Pressure Impactor (ELPI,  $\delta$ ) and an Aerodynamic Particle Sizer (APS,  $\chi$ ).

ELPI is a quasi-real-time aerosol spectrometer (Marjamäki et al., 2000). It is composed of a corona charger and a 12-stage cascade low pressure impactor. Each stage of the impactor is connected to an electrometer. The corona charger is used to set the electrical charge of the particles to a specific level. Then, the low pressure impactor classifies the aerosol particles into 12 size classes according to their aerodynamic diameter (from 7 nm to 10  $\mu\text{m}$ ). Finally, the electrometers measure the electrical charge carried by the particles collected by each impaction stage. This charge is finally converted to the number of particles collected according to the charging efficiency function of the corona charger.

APS is also a quasi-real-time aerosol spectrometer (Baron, 1986). It measures the time-of-flight of individual particles accelerated by a controlled accelerating flow imposed by a calibrated nozzle. The time-of-flight of each aerosol particle is then converted into its aerodynamic diameter. Thus, the APS classifies the aerosol particles in terms of aerodynamic diameter from 500 nm to 20 µm over 52 size classes.

APS and ELPI are both used for their complementary size ranges so all the particles produced in our laboratory can be sized. For particles with a median aerodynamic diameter less than 0.8 µm, the size distribution is measured using an ELPI. For the others, we favour the use of an APS because of the better size resolution. “

**Q24 :** p. 14. Table 1: The uncertainties of the measured quantities should be indicated.

This has been corrected

**Q25 :** p. 14. Eq. 9: How do you determine the Cunningham factor for  $d_{ap}$ ? Is this an iteration method to calculate  $d_{ap}$ ?

Yes it is. We added in the text

“This median aerodynamic diameter is converted into a physical diameter ( $d_{ap}$ ) by means of the following expression (which is solved iteratively):

$$d_{ap} = d_{aero} \sqrt{\frac{C_{c,d_{aero}} \left( \frac{\rho_0}{\rho_p} \right)}{C_{c,d_{ap}}}} \quad (9) “$$

**Q26 :** p. 14. Eq. 10: What is FG in the equation?

This was a typo. It is corrected into GF

**Q27 :** p. 15. Line 15: “x axis” is a very loose formulation.

This is rephrased (p 16 line 9to 10)

“All our measurements are summarised in Table 2 and plotted in **Erreur ! Source du renvoi introuvable.**10 as a function of the median diameter of the distribution of the physical diameter of the particles..”

**Q28 :** p. 15. Line 18: “model of reference in the environment” – again a loose formulation.

This is rephrased (p16 l 12 to 14) :

“It should be remembered that the *in situ* scavenging measurements (Volken and Shumann, 1993; Laakso *et al.*, 2003; Chate, 2005) are only compared to the Slinn model.”



p. 15. Line 24: I suggest here to consider the other physical processes involved in collision for different particle sizes, such as Brownian motion, thermophoresis, diffusiophoresis, electroscavenging, etc. Good reference for that might be the paper of Ladino et al., ACP, pp. 9745 (2013), and the book of Pruppacher and Klett (2010).

Q29 :

This remark is aborted in different parts of the article :

First in section 1, we introduced all the mechanisms involved in the collection of aerosol particles by drop and droplets. We add in the text (p4 line 1 to p5 line 5):

“To compute this efficiency, one has to describe and model all the processes involved in the collection of particles by falling raindrops. Several mechanisms are usually considered, which are summarised hereafter; however, a more exhaustive review can be found in the literature (Pruppacher *et al.*, 1998; Chate, 2005; Ladino *et al.*, 2013; Ardon-Dryer *et al.*, 2015). The three main mechanisms leading to this collection are Brownian motion, inertial impaction and interception. Small particles, with a radius on the order of the mean free path of the air molecules or smaller, are very sensitive to the collision of air molecules. Therefore, they shall deviate from streamlines due to Brownian motion. For large particles, with a diameter greater than 1  $\mu\text{m}$ , their inertia prevents them from following the streamlines of the flow and they impact the drop on its leading edge. Aerosol particles with a diameter smaller than 1  $\mu\text{m}$  and much larger than the mean free path of the air molecules follow the streamlines of the flow around the drop. They might nevertheless enter in contact with the drop when the streamlines approach the drop at a distance smaller than the radius of the aerosol particle. For particles with diameter between 0.2  $\mu\text{m}$  and 1  $\mu\text{m}$ , there is a minimum collection efficiency called the “Greenfield Gap” (Greenfield, 1957). For these particles, none of the three described mechanisms is efficient for collection. It is expected that phoretic forces would be the most efficient mechanisms. To be thorough, secondary mechanisms for collision are also described here. Thermophoresis and diffusiophoresis are respectively linked to thermal and water vapour gradients. The side of a particle exposed to warmer air is impacted by molecules with higher kinetic energy than molecules impacting the colder side. As a result, thermophoresis results in a force whose direction is the opposite of the thermal gradient. Similarly, particles exposed to a water vapour gradient are exposed to molecular collisions with a dissymmetric kinetic energy since water vapour molecules are lighter than air molecules. In the atmosphere, diffusiophoresis results in a force whose direction is the opposite of the water vapour gradient. Electro-scavenging could also have an important contribution when both droplets and aerosols particles are electrically charged, resulting in an attractive (or repulsive) force when they have opposite (or identical) polarity. Moreover, Tinsley *et al.* (2000, 2006) theoretically showed that electrically charged aerosol particles can induce an image charge on droplets that results in a short range electrical attraction that increases collection efficiency even with neutrally charged droplets.

For each of these elementary mechanisms, theoretical expressions of the elementary collection efficiencies have been derived (Table 1).

Table 1. References of theoretical expressions for the calculation of each collection mechanism

| Elementary mechanism | Reference |
|----------------------|-----------|
|----------------------|-----------|

|                    |                                                                                                             |
|--------------------|-------------------------------------------------------------------------------------------------------------|
| Inertial impaction | Slinn (1977); Park <i>et al.</i> (2005)                                                                     |
| Interception       | Slinn (1977); Park <i>et al.</i> (2005)                                                                     |
| Brownian motion    | Slinn (1977); Park <i>et al.</i> (2005)                                                                     |
| Diffusiophoresis   | Waldmann (1959); Davenport and Peters (1978);<br>Andronache <i>et al.</i> (2006); Wang <i>et al.</i> (2010) |
| Thermophoresis     | Davenport and Peters (1978); Andronache <i>et al.</i> (2006); Wang <i>et al.</i> (2010)                     |
| Electroscavenging  | Davenport and Peters (1978); Andronache <i>et al.</i> (2006); Wang <i>et al.</i> (2010)                     |
| Image forces       | Tinsley and Zhou (2015)                                                                                     |

Finally, the droplet total collection efficiency can be theoretically deduced by adding all these elementary collection efficiencies together. The use of these theoretical models seems justified for cloud droplets since they have very small Reynolds numbers. However, for raindrops with larger sizes and Reynolds numbers, there are many additional uncertainties.”

Moreover we added in the article many details to show that we want to minus phoretic effect and electro-scavenging in order to be in line with the hypothesis of the Beard (1974) model. For example we added at the end of section 2:

“The objective of these modifications is also to be consistent with the hypothesis of the Beard (1974) model, which considers only drag and gravitational forces on the aerosol particles. The modifications are thus intended to minimise electroscavenging (discussed in sections 2.1 and 2.3), diffusiophoresis (discussed in section 2.3 and Appendix 1) and thermophoresis. Both the drop generator and aerosol chamber are described in the following sections.”

At the end of section 2.1 we added a small:

“Classical piezoelectric drop-on-demand systems may produce electrically charged droplets (Ardon-Dryer *et al.*, 2015). However, we want to limit electro-scavenging as Beard (1974) did in his simulations. To control electro-scavenging, the net charge of each drop produced by this system has been measured with the help of a Faraday pail connected to an electrometer (Keithley model 6514; Sow & Lemaitre, 2016). Any electrical charge on the drop was detected by our sensitive electrometer (limit of 10 fC). This might be explained by the fact that unlike classical piezoelectric drop-on-demand systems (such as those of microdrop Technologies and MicroFab Technologies), the piezoelectric transducer in our drop generator is not in direct contact with the liquid (Figure 2).”

We calculated the contribution of diffusiophoresis (with the model of Davenport and Peters, 1978). We add this contribution on a new plot (figure 12):

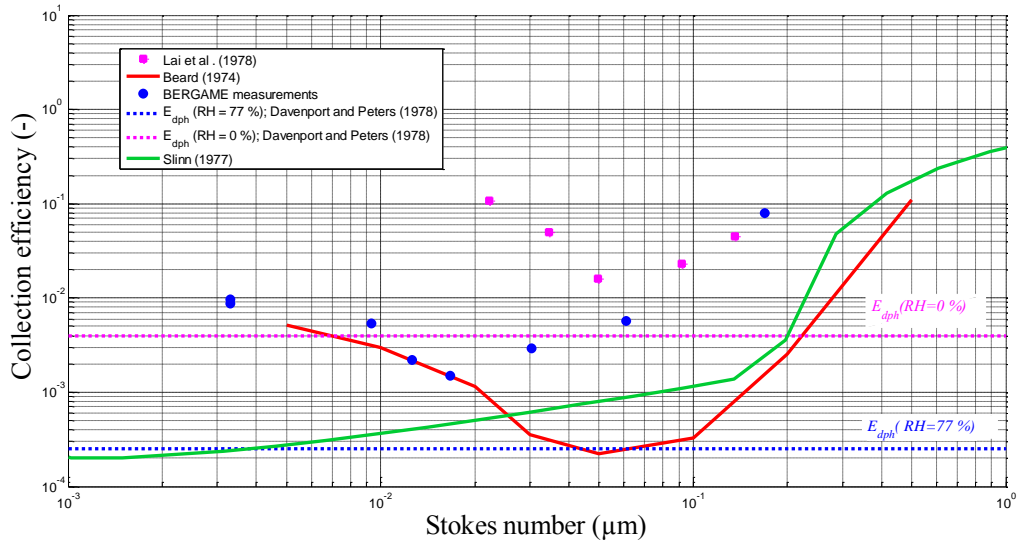

Figure 3. Collection efficiencies measured in this study and by Lai *et al.* (1978). Both measurements are compared to Slinn (1977) and Beard (1974) models. The contribution of diffusiophoresis in both studies are computed following the description of Davenport and Peters (1978)

Thus we show that diffusiophoresis is a second order mechanism in our experiments.

Finally, we also suggest that Brownian diffusion (that is not considered in the Beard model) could explain why when the integration of the Beard model over the size distribution of the aerosol particle during our measurements for the smallest particles ( $0.22 \mu\text{m}$ ) underestimates our measurement (figure 11 ). (p 20 line 9 to 14)

“These differences could be attributed to the fact that, for these points, the resolution of equation (12) requires an extrapolation of Beard (1974) calculations beyond the size range he investigated (continuous line on Figure 11). Moreover, for the collection efficiency measured for the finest aerosol particles ( $d_{ap} = 0.22 \mu\text{m}$ ), the discrepancy observed with the Beard model could also be explained by the hypothesis of the simulations. Indeed, the Brownian motion was neglected. This can be justified in the particle size range investigated; however, it is much less justified when extrapolating the simulations to finer aerosol particles. “

p. 17. Line 10: To be honest, I do not see the significant improvement. The difference between measurements and theory is still large. I suggest you to indicate a range of possible collection efficiencies as a shadowed area, for instance, in the Figure by calculating collection efficiencies corresponding to the smallest and largest aerosol particle at a given  $d_{ap}$ .

Q30 :

The sentence and the caption of the figure have been modified to enhance the clarity of the statement.

Indeed, as the particles are not perfectly mono-dispersed in our experiments (this is also the case in other experiment see Lai et al for example), we cannot directly compare our measurements to the Beard model (red curve in figure 11). We first need to integrate this model over the size distribution of the particle we measured in the aerosol chamber for the considered measurement (in mass, because with fluorescein spectroscopy we measure a mass). And then compare this integration of the Beard model (red dots) can be compared to our measurement points (blue dots). We observe a nearly perfect superimposition except for the first and last measurement points and we added discussions to explain that.

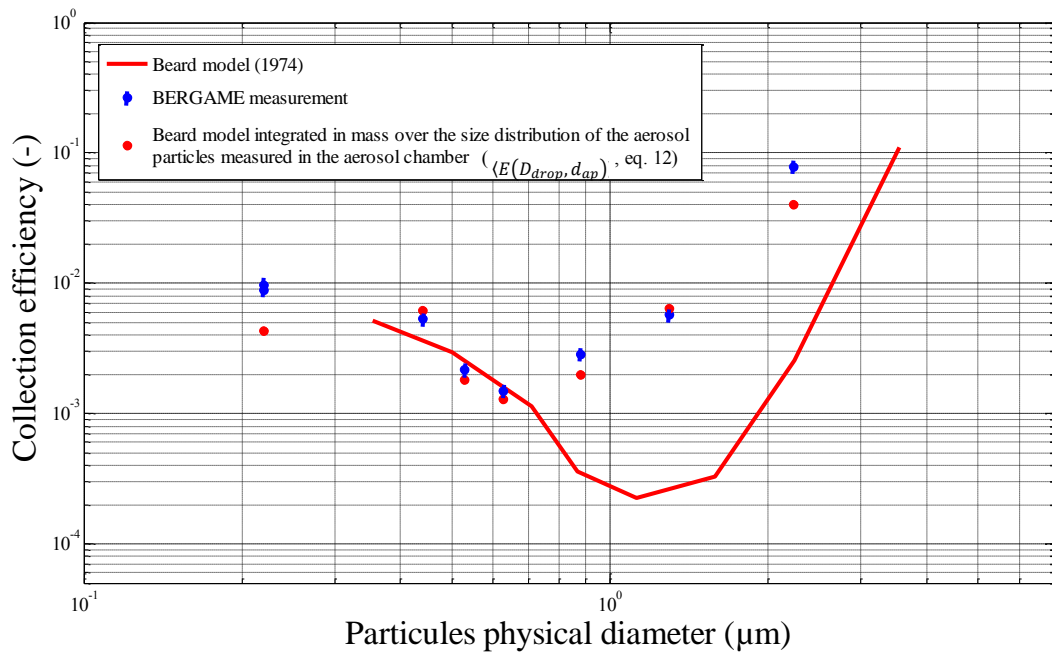

Figure 4. Integration of the Beard (1974) model over the particle size distribution of each of our experiments, for a drop of 1.25 mm diameter.

We note a significant improvement of the agreement between our measurements and the Beard (1974) model since it is integrated over the entire particle size distribution measured during our experiments in BERGAME (red dots on Figure 11).

p. 17. Line 18: I do not really get the point. Have you taken into account the rear capture or not? If not, is it possible to do that and modify the collection efficiency curve?

Q31 :

This sentence was inappropriately formulated. I mean to say that the Slinn model that doesn't take into account rear capture leads to error on the collection efficiency of two orders of magnitudes in the submicronic range.

We reformulate to p17 line 27 to 28:

“Indeed, the Slinn (1977) model which neglects rear capture underestimates the collection efficiency by two orders of magnitude in the submicronic range compared to Beard's model (1974).”

As the Slinn model is easy to use and shows good agreements with Beard model for aerosol particles greater than one micron, we want to produce an additional correlation based on the simulations of Beard (1974) to model the elementary collection efficiency induced by Rear capture (equation 14 of the article).

$$E_{Rear-capture} = \frac{1}{3 \times 10^7} Re_{drop} \times St_{ap}^{-1.23} \quad (14)$$

This new elementary collection efficiency due to Rear capture would we added to the others presented in table 1 of the article. Thus Slinn model (with impaction, interception and Brownian motion) plus this new elementary mechanism for rear capture is in line with the Bear results, which we just validated experimentally. In his publication Bear noticed that rear capture is the main mechanism for particles with a Stokes number smaller than  $5 \times 10^{-2}$ . To produce an ease of use correlation we gather all his simulations points in that stokes number ranger and apply a power law fit.

To better explain we added the underlines text.

“Based on these comparisons, we can consider that the Beard (1974) model is validated for addressing the collection of the aerosol particles of the accumulation mode by raindrops. Finally, it seems necessary to provide, to facilitate its use, an analytical expression to assess the contribution of the rear capture ( $E_{Rear-capture}$ ) to the raindrop collection efficiency. Indeed, the Slinn (1977) model which neglects rear capture underestimates the collection efficiency by two orders of magnitude in the submicronic range compared to Beard's model (1974). Furthermore, Beard (1974) noticed from his theoretical simulations that rear capture plays a main role in collection efficiency for aerosol particles with a Stokes number smaller than  $5 \times 10^{-2}$ . Thus, to derive an analytical expression for the elementary collection efficiency resulting from rear capture alone ( $E_{rear-capture}$ ), we gather in **Erreur ! Source du renvoi introuvable.**13 the collection efficiencies numerically simulated by Beard (1974) for a Stokes number smaller than  $5 \times 10^{-2}$  (crosses in Figure 13). These collection efficiencies are plotted as a function of the Reynolds number of the drops and the Stokes number of the particles.”

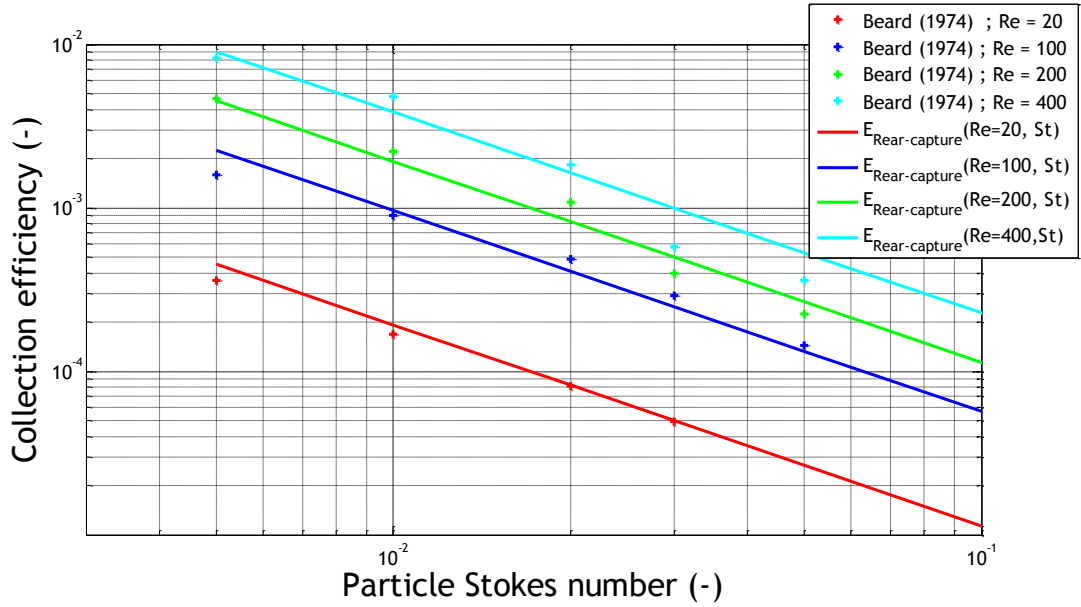

Figure 5. Semi-empirical parametrization of rear capture.

This figure suggests that the Reynolds number of the drop and Stokes number of the aerosol particles are the two parameters influencing rear capture. The dependency on these two dimensionless numbers is physical as the Reynolds number of the drop ( $Re_{drop}$ ) reflects the intensity and the size of the areas of recirculating flow in its wake and the particle Stokes number ( $St_{ap}$ ) reflects the susceptibility of the particle to pass through the recirculating flow in the wake of the drop without being trapped.

Applying a power law fit to the simulations of Beard (1974) yields equation 14.

$$E_{Rear-capture} = \frac{1}{3 \times 10^7} Re_{drop} \times St_{ap}^{-1.23} \quad (14)$$

This correlation is presented in solid lines in Figure 13 and shows a satisfactory agreement with K.V. Beard's simulations (crosses) in the corresponding range of drop Reynolds number and particle Stokes number. However, it should be kept in mind that this relationship is only valid for drop Reynolds numbers larger than 20 (a 280  $\mu\text{m}$  drop at its terminal velocity), since below this critical value there is no recirculating flow behind the drop (Le Clair *et al.*, 1972). Finally, this new contribution should be added to those presented in Table 1 for raindrops.

p. 18. Line 4: I do not see the relevance of this figure, and its connection to the present experiments. Again, how do you account for the rear capture to calculate the collection efficiency?

Q32 :

I think I answered this question in the answer of previous question. As the Beard model seems validated from our measurements, we gather on this figure the simulation points from Beard publication, for which he noticed they were dominated by rear capture (Stokes number smaller than  $5 \times 10^{-2}$ ) and we uses these points to derive an elementary collection efficiency correlation for rear capture.

I think that without any ease of use correlation like the one produced in equation 14 rear capture would continue to be neglected.

Q33 : p. 20. Line 7: Please use dot instead of comma for the numbers.

Corrected

p. 21. Line 3: The dimension of the volume (and, consequently, its error) is meter cube, not meter.

Q34 :

This was a typo. It is corrected (p25 line 29-30):

“The uncertainty in the volume of dissolution is very low, we estimate its maximum error ( $EMT_{V_{sol}}$ ) to be one millilitre.”
